# Supplementary material for: Colistin Resistance Mechanisms in Human Salmonella enterica Strains Isolated by the National Surveillance Enter-Net Italia (2016–2018)
Source: MDPI journal article supplement (doi:10.3390/antibiotics11010102), 2022-01-13
Supplement: s1 [file s1]

**Supplementary Figure S1. Single Nucleotide Polymorphism and core genome MLST analysis performed COL-S and COL-R *mcr*-negative *Salmonella enterica* serovar Enteritidis genomes analyzed in this study.**

Panel A: SNP-based phylogenetic tree created by CSIPhylogeny DTU tool.

Panel B: SNP Matrix obtained by CSIPhylogeny DTU tool.

Panel C: cgMLST matrix created by DTU tool.

(A)

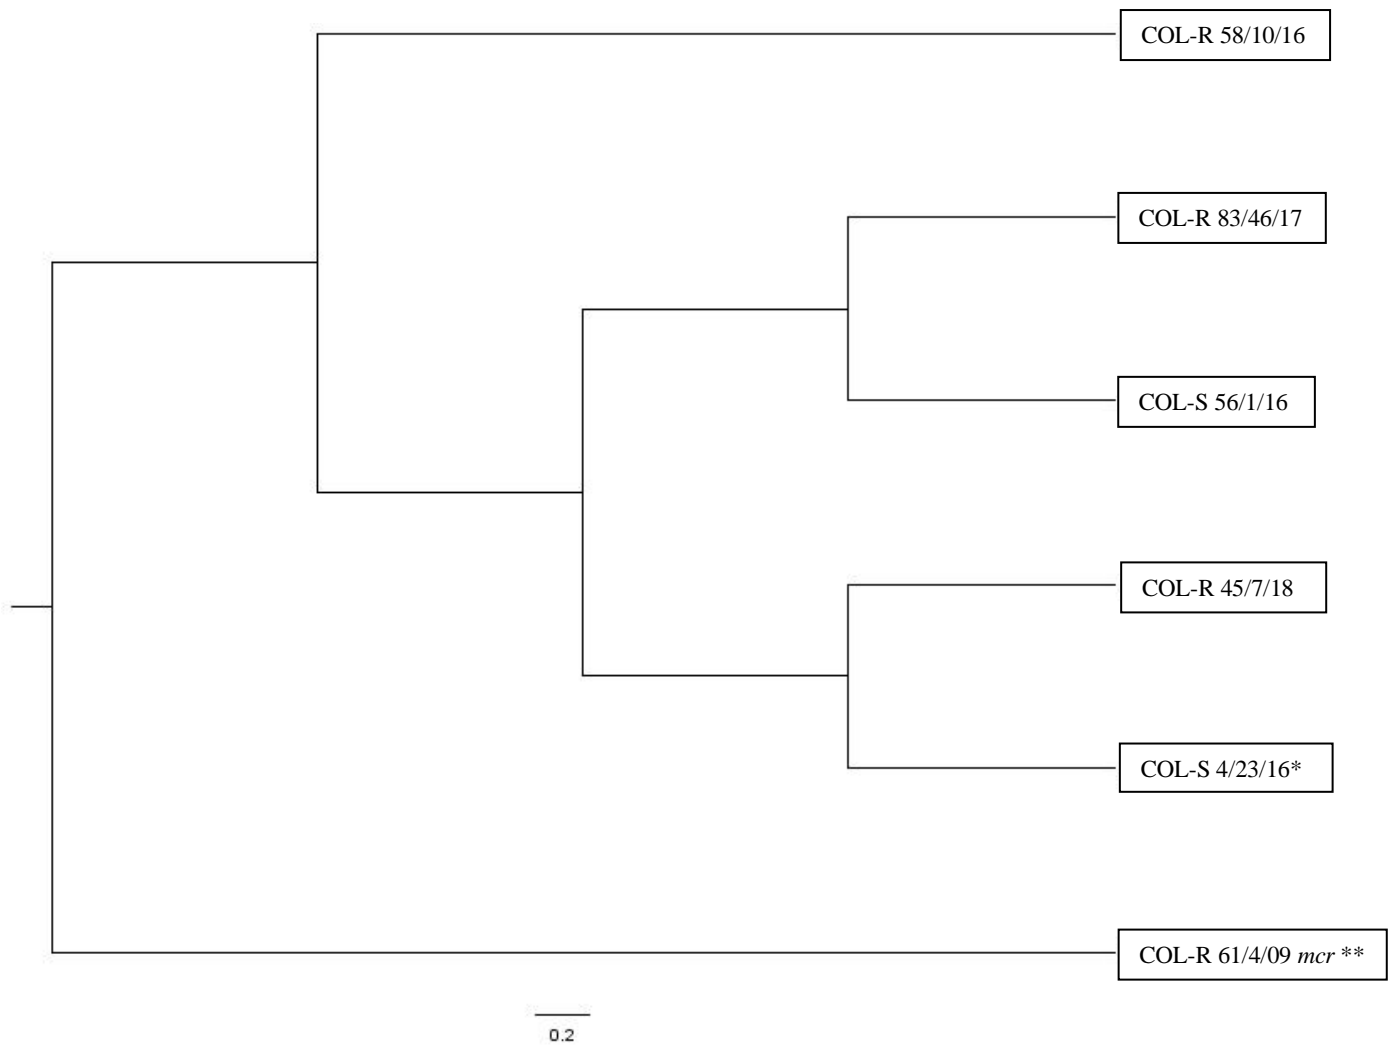

(B)

| SNP matrix <sup>a</sup> | COL-R<br><i>mcr</i><br>61/4/09** | COL-R<br>45/7/18 | COL-R<br>58/10/16 | COL-R<br>83/46/17 | COL-S<br>4/23/16* | COL-S<br>56/1/16 |
|-------------------------|----------------------------------|------------------|-------------------|-------------------|-------------------|------------------|
| 61/4/09                 | 0                                | 494              | 494               | 479               | 487               | 491              |
| 45/7/18                 | 494                              | 0                | 97                | 44                | 59                | 58               |
| 58/10/16                | 494                              | 97               | 0                 | 79                | 94                | 91               |
| 83/46/17                | 479                              | 44               | 79                | 0                 | 45                | 36               |
| 4/23/16                 | 487                              | 59               | 94                | 45                | 0                 | 57               |
| 56/1/16                 | 491                              | 58               | 91                | 36                | 57                | 0                |

(C)

| cgMLST matrix <sup>b</sup> | COL-R<br><i>mcr</i><br>61/4/09* | COL-R<br>45/7/18 | COL-R<br>58/10/16 | COL-R<br>83/46/17 | COL-S<br>4/23/16 | COL-S<br>56/1/16 |
|----------------------------|---------------------------------|------------------|-------------------|-------------------|------------------|------------------|
| 61/4/09                    | 0                               | 221              | 222               | 214               | 219              | 218              |
| 45/7/18                    | 221                             | 0                | 43                | 24                | 31               | 30               |
| 58/10/16                   | 222                             | 43               | 0                 | 35                | 44               | 40               |
| 83/46/17                   | 214                             | 24               | 35                | 0                 | 25               | 17               |
| 4/23/16                    | 219                             | 31               | 44                | 25                | 0                | 28               |
| 56/1/16                    | 218                             | 30               | 40                | 17                | 28               | 0                |

In Panel A, \* COL-S *S. Enteritidis* 4/23/16 was chosen as reference strain for the SNP analysis. \*\* Unrelated COL-R *mcr*-positive *S. Enteritidis* was added for comparison.

In Panel B<sup>a</sup> : Percentage of reference genome covered by all isolates: 98.9%. 4,651,340 positions were found in all analyzed genomes. Size of reference genome: 4,702,777.

In Panel B<sup>b</sup>: *Salmonella* core genome = 3,002 loci. cgMLST allele calls were accepted for allele coverage >95%.
