# Supplementary material for: Colistin Resistance Mechanisms in Human Salmonella enterica Strains Isolated by the National Surveillance Enter-Net Italia (2016–2018)
Source: MDPI journal article supplement (doi:10.3390/antibiotics11010102), 2022-01-13
Supplement: s1 [file s1]

**Supplementary Table S3:** Analysis of *pilN*, *ydeI*, *lolB*, and *zraR* allele frequency in COL-R *mcr*-negative *S. Enteritidis* strains against wild type alleles, in the cgMLST database (pubMLST site).

| Gene<br>(Locus name<br>cgMLST) | N° of allele<br>variants of<br>cgMLST locus | N° of<br>records in<br>pubMLST | Strain with allele variant           |
|--------------------------------|---------------------------------------------|--------------------------------|--------------------------------------|
| <i>pilN</i><br>(STMMW_34811)   | 493                                         | 31                             | 58/10/16                             |
|                                | 25                                          | 3,882                          | 45/7/18, 83/46/17, 56/1/16, 4/23/16  |
| <i>ydeI</i><br>(STMMW_15151)   | 302                                         | 4                              | 58/10/16                             |
|                                | 26                                          | 4,196                          | 45/7/18, 83/46/17, 56/1/16, 4/23/16  |
| <i>lolB</i><br>(STMMW_17701)   | 341                                         | 46                             | 58/10/16                             |
|                                | 20                                          | 4,403                          | 45/7/18, 83/46/17, 56/1/16, 4/23/16  |
| <i>zraR</i><br>(STMMW_41271)   | 1573                                        | 0                              | 45/7/18                              |
|                                | 29                                          | 3,962                          | 58/10/16, 83/46/17, 56/1/16, 4/23/16 |
