# Supplementary material for: Colistin Resistance Mechanisms in Human Salmonella enterica Strains Isolated by the National Surveillance Enter-Net Italia (2016–2018)
Source: MDPI journal article supplement (doi:10.3390/antibiotics11010102), 2022-01-13
Supplement: s1 [file s1]

**Supplementary Table S2.** Deleterious mutated proteins present in COL-R *mcr*-negative *S. Enteritidis* strains that were not further discussed in the study.

| Protein name                                                                                 | PROVEAN | 58/10/16    | 83/46/17    | 45/7/18        |
|----------------------------------------------------------------------------------------------|---------|-------------|-------------|----------------|
| 2-methylcitrate synthase, McsA                                                               | -6.946  | G24D        | no mutation | no mutation    |
| Periplasmic alpha-amylase, MalS                                                              | -2.558  | A538E       | no mutation | no mutation    |
| Cell division protein, FtsQ                                                                  | -3.689  | E141G       | no mutation | no mutation    |
| Protein translocase subunit, SecD                                                            | -3.625  | P403L       | no mutation | no mutation    |
| Putative dihydroxyacid dehydratase, DHAD                                                     | -7.941  | G185R       | no mutation | no mutation    |
| Propanediol dehydratase reactivation factor large subunit, PduG                              | -7.944  | P403Q       | no mutation | no mutation    |
| Aspartokinase / Homoserine dehydrogenase, ThrA                                               | -3.578  | A215T       | no mutation | no mutation    |
| (lipoprotein)-autotransporter outer membrane beta-barrel domain-containing protein, YhjY     | -7.992  | R148W       | no mutation | no mutation    |
| Glucitol operon repressor, SrlR                                                              | -3.623  | no mutation | no mutation | T31A           |
| Pyrimidine / purine nucleotide 5'-monophosphate nucleosidase, PpnN                           | -6.555  | no mutation | no mutation | D419A          |
| Cobalt-precorrin-4 C (11)-methyltransferase, CbiF                                            | -3.277  | no mutation | no mutation | R225C          |
| Transcriptional regulator, SlmA                                                              | -5.589  | no mutation | no mutation | R31G           |
| Enoyl-CoA hydratase / 3-hydroxyacyl-CoA dehydrogenase / 3-hydroxybutyryl-CoA epimerase, FadJ | -6.948  | no mutation | no mutation | V326G          |
| L-ribulose-5-phosphate 4-epimerase, AraD                                                     | -5.795  | no mutation | no mutation | T117P          |
| Flagellar motor switch protein, FliN                                                         | -5.741  | no mutation | no mutation | Q83P           |
| Lysine/cadaverine antiporter membrane protein, CadB                                          | -2.561  | no mutation | no mutation | L417Q          |
| Argininosuccinate lyase, ArgH                                                                | -3.861  | no mutation | no mutation | T155S          |
| Propanediol dehydratase large subunit, PduC                                                  | -10.869 | no mutation | no mutation | S264-E265insGS |
| 3-oxo-tetronate kinase, OtnK (YgbK)                                                          | -2.841  | no mutation | A91D        | no mutation    |

no mutation: no mutation was detected in the protein sequence compared with the COL-  
S *S. Enteritidis* 4/23/16 and 56/1/16 strains.
