# Supplementary material for: Colistin Resistance Mechanisms in Human Salmonella enterica Strains Isolated by the National Surveillance Enter-Net Italia (2016–2018)
Source: MDPI journal article supplement (doi:10.3390/antibiotics11010102), 2022-01-13
Supplement: s1 [file s1]

**Supplementary Table S1.** Epidemiological data and antimicrobial resistance of all the strains included in this study.

| Strain   | Serogroup      | Sample | Date       | MIC COL (mg/L) | PCR <i>mcr</i> 1-10/ Sequenced | Other antimicrobial resistance |
|----------|----------------|--------|------------|----------------|--------------------------------|--------------------------------|
| 61/4/09* | Enteritidis    | UNK    | 10/09/2009 | 4              | <i>mcr-1.1</i> /SEQ            | ASuTNaSxt                      |
| c        | 1,4,[5],12:i:- | FAECES | 21/10/2016 | 4              | <i>mcr-1.1+mcr-5.1</i> /SEQ    | ASSuTG                         |
| 22/17/16 | 1,4,[5],12:i:- | FAECES | 19/02/2016 | 4              | neg                            | ASSuTAmc                       |
| 57/13/16 | Typhimurium    | FAECES | 05/07/2016 | 4              | neg                            | ASSuTmpSxtAmc                  |
| 57/14/16 | Enteritidis    | FAECES | 24/07/2016 | 4              | neg                            | ND                             |
| 46/32/16 | Enteritidis    | FAECES | 15/08/2016 | 4              | neg                            | ND                             |
| 53/13/16 | Enteritidis    | FAECES | 20/09/2016 | 4              | neg                            | ND                             |
| 54/4/16  | Enteritidis    | FAECES | 26/09/2016 | 4              | neg                            | ND                             |
| 54/11/16 | Enteritidis    | FAECES | 07/10/2016 | 4              | neg                            | ND                             |
| 58/10/16 | Enteritidis    | FAECES | 17/10/2016 | 4              | neg/SEQ                        | Suscept                        |
| 18/12/17 | Enteritidis    | FAECES | 22/02/2017 | 4              | neg                            | ND                             |
| 18/16/17 | Enteritidis    | FAECES | 01/03/2017 | 4              | neg                            | ND                             |
| 83/13/17 | Enteritidis    | UNK    | 16/03/2017 | 4              | neg                            | Suscept                        |
| 23/22/17 | Enteritidis    | FAECES | 23/03/2017 | 4              | neg                            | ND                             |
| 49/10/17 | Enteritidis    | FAECES | 03/07/2017 | 4              | neg                            | ND                             |
| 83/37/17 | Enteritidis    | FAECES | 21/08/2017 | 4              | neg                            | Suscept                        |
| 57/8/17  | Enteritidis    | FAECES | 22/08/2017 | 4              | neg                            | ND                             |
| 60/6/17  | Enteritidis    | FAECES | 28/08/2017 | 4              | neg                            | ND                             |
| 83/47/17 | Enteritidis    | FAECES | 15/09/2017 | 4              | neg                            | Suscept                        |
| 83/46/17 | Enteritidis    | FAECES | 19/09/2017 | 4              | neg/SEQ                        | Suscept                        |
| 78/17/17 | Enteritidis    | FAECES | 06/11/2017 | 4              | neg                            | ND                             |
| 17/1/18  | Enteritidis    | FAECES | 02/02/2018 | 4              | neg                            | Suscept                        |
| 31/1/18  | Enteritidis    | FAECES | 03/04/2018 | 4              | neg                            | NaPef                          |
| 75/20/18 | Enteritidis    | FAECES | 02/05/2018 | 4              | neg                            | Suscept                        |
| 45/7/18  | Enteritidis    | FAECES | 31/05/2018 | 4              | neg/SEQ                        | Suscept                        |
| 27/1/16  | Enteritidis    | FAECES | 25/01/2016 | 2              | neg                            | Suscept                        |
| 27/10/16 | Enteritidis    | FAECES | 11/03/2016 | 2              | neg                            | Suscept                        |
| 56/1/16  | Enteritidis    | FAECES | 02/04/2016 | 2              | neg/SEQ                        | Suscept                        |
| 57/21/16 | Enteritidis    | FAECES | 24/07/2016 | 2              | neg                            | Suscept                        |
| 57/28/16 | Enteritidis    | FAECES | 14/08/2016 | 2              | neg                            | Suscept                        |
| 57/32/16 | Enteritidis    | FAECES | 19/08/2016 | 2              | neg                            | NaPef                          |
| 57/39/16 | Enteritidis    | FAECES | 06/09/2016 | 2              | neg                            | Suscept                        |
| 77/83/18 | Enteritidis    | FAECES | 13/09/2016 | 2              | neg                            | ND                             |
| 57/41/16 | Enteritidis    | FAECES | 18/09/2016 | 2              | neg                            | Suscept                        |
| 57/45/16 | Enteritidis    | FAECES | 06/10/2016 | 2              | neg                            | Suscept                        |
| 55/20/16 | Saintpaul      | FAECES | 09/08/2016 | 2              | neg                            | ND                             |
| 9/5/17   | Enteritidis    | FAECES | 09/01/2017 | 2              | neg                            | ND                             |
| 18/11/17 | Enteritidis    | FAECES | 21/02/2017 | 2              | neg                            | ND                             |
| 18/15/17 | Enteritidis    | FAECES | 27/02/2017 | 2              | neg                            | ND                             |
| 23/17/17 | Enteritidis    | FAECES | 11/03/2017 | 2              | neg                            | ND                             |
| 23/19/17 | Enteritidis    | FAECES | 16/03/2017 | 2              | neg                            | ND                             |
| 23/18/17 | Enteritidis    | BLOOD  | 18/03/2017 | 2              | neg                            | ND                             |
| 23/25/17 | Enteritidis    | FAECES | 20/03/2017 | 2              | neg                            | ND                             |

|          |                  |        |            |   |     |              |
|----------|------------------|--------|------------|---|-----|--------------|
| 23/44/17 | Enteritidis      | FAECES | 27/03/2017 | 2 | neg | ND           |
| 53/1/17  | Enteritidis      | FAECES | 21/07/2017 | 2 | neg | ND           |
| 57/7/17  | Enteritidis      | FAECES | 08/08/2017 | 2 | neg | ND           |
| 83/32/17 | Enteritidis      | FAECES | 09/08/2017 | 2 | neg | Suscept      |
| 57/6/17  | Enteritidis      | BLOOD  | 16/08/2017 | 2 | neg | ND           |
| 57/9/17  | Enteritidis      | FAECES | 28/08/2017 | 2 | neg | ND           |
| 60/13/17 | Enteritidis      | FAECES | 02/09/2017 | 2 | neg | ND           |
| 61/9/17  | Enteritidis      | FAECES | 04/09/2017 | 2 | neg | ND           |
| 60/15/17 | Enteritidis      | FAECES | 06/09/2017 | 2 | neg | ND           |
| 60/14/17 | Enteritidis      | FAECES | 07/09/2017 | 2 | neg | ND           |
| 53/32/17 | 1,4,[5],12:i:-   | FAECES | 26/07/2017 | 2 | neg | ASSuT        |
| 53/36/17 | 1,4,[5],12:i:-   | FAECES | 27/07/2017 | 2 | neg | ACSSuTtmpSxt |
| 57/13/17 | 1,4,[5],12:i:-   | FAECES | 05/08/2017 | 2 | neg | ASSuT        |
| 57/11/17 | 1,4,[5],12:i:-   | FAECES | 07/08/2017 | 2 | neg | SSuT         |
| 53/35/17 | 1,4,[5],12:i:-   | FAECES | 17/08/2017 | 2 | neg | ASSuT        |
| 60/11/17 | 1,4,[5],12:i:-   | FAECES | 06/09/2017 | 2 | neg | ASSuT        |
| 78/8/17  | 1,4,[5],12:i:-   | UNK    | 07/09/2017 | 2 | neg | ASSuT        |
| 78/10/17 | 1,4,[5],12:i:-   | UNK    | 15/09/2017 | 2 | neg | ASSuT        |
| 78/9/17  | 1,4,[5],12:i:-   | UNK    | 21/09/2017 | 2 | neg | ASSuT        |
| 75/14/18 | 1,4,[5],12:i:-   | FAECES | 18/12/2017 | 2 | neg | ASSuNaPef    |
| 13/1/18  | Bovismorbificans | FAECES | 12/10/2017 | 2 | neg | Su           |
| 83/53/17 | Brandenburg      | FAECES | 01/10/2017 | 2 | neg | ND           |
| 51/73/18 | Brandenburg      | FAECES | 22/10/2017 | 2 | neg | Suscept      |
| 84/22/17 | Brandenburg      | FAECES | 20/11/2017 | 2 | neg | ND           |
| 83/22/17 | Muenchen         | BLOOD  | 07/06/2017 | 2 | neg | Su           |
| 2/4/18   | Thompson         | FAECES | 03/08/2017 | 2 | neg | Suscept      |
| 8/15/18  | Newport          | FAECES | 10/08/2017 | 2 | neg | Suscept      |
| 45/28/18 | Enteritidis      | FAECES | 21/01/2018 | 2 | neg | ANaPef       |
| 52/2/18  | Enteritidis      | FAECES | 08/03/2018 | 2 | neg | ND           |
| 77/85/18 | Enteritidis      | FAECES | 11/04/2018 | 2 | neg | ND           |
| 52/5/18  | Enteritidis      | FAECES | 26/04/2018 | 2 | neg | ND           |
| 52/3/18  | Enteritidis      | BLOOD  | 28/04/2018 | 2 | neg | ND           |
| 52/4/18  | Enteritidis      | FAECES | 30/04/2018 | 2 | neg | ND           |
| 52/6/18  | Enteritidis      | FAECES | 04/05/2018 | 2 | neg | ND           |
| 52/7/18  | Enteritidis      | FAECES | 17/05/2018 | 2 | neg | Suscept      |
| 52/8/18  | Enteritidis      | FAECES | 24/05/2018 | 2 | neg | Su           |
| 45/11/18 | Enteritidis      | FAECES | 29/05/2018 | 2 | neg | Suscept      |
| 45/8/18  | Enteritidis      | FAECES | 31/05/2018 | 2 | neg | Suscept      |
| 68/25/18 | Enteritidis      | FAECES | 15/06/2018 | 2 | neg | Su           |
| 77/24/18 | Enteritidis      | FAECES | 10/07/2018 | 2 | neg | Suscept      |
| 52/10/18 | Enteritidis      | BLOOD  | 13/07/2018 | 2 | neg | Su           |
| 77/36/18 | Enteritidis      | FAECES | 24/07/2018 | 2 | neg | NaPef        |
| 77/41/18 | Enteritidis      | FAECES | 30/08/2018 | 2 | neg | Su           |
| 91/11/18 | Enteritidis      | FAECES | 30/08/2018 | 2 | neg | Suscept      |
| 13/11/17 | Enteritidis      | FAECES | 08/09/2018 | 2 | neg | ND           |
| 13/14/19 | Enteritidis      | FAECES | 15/09/2018 | 2 | neg | Su           |
| 91/32/18 | Enteritidis      | UNK    | 18/09/2018 | 2 | neg | Suscept      |
| 15/10/19 | Enteritidis      | FAECES | 08/12/2018 | 2 | neg | Su           |
| 87/22/18 | 1,4,[5],12:i:-   | UNK    | 17/01/2018 | 2 | neg | ASSuT        |

|          |                  |        |            |   |         |                     |
|----------|------------------|--------|------------|---|---------|---------------------|
| 13/8/19  | 1,4,[5],12:i:-   | FAECES | 01/02/2018 | 2 | neg     | ASSuTTmpSxtNaPef    |
| 13/9/19  | 1,4,[5],12:i:-   | FAECES | 02/08/2018 | 2 | neg     | ASSuTSxt            |
| 45/3/18  | Napoli           | FAECES | 17/05/2018 | 2 | neg     | Suscept             |
| 11/4/19  | Napoli           | FAECES | 05/11/2018 | 2 | neg     | Suscept             |
| 29/1/18  | Typhi            | FAECES | 21/03/2018 | 2 | neg     | Suscept             |
| 11/5/19  | Winston          | FAECES | 29/10/2018 | 2 | neg     | Suscept             |
| 4/23/16  | Enteritidis      | FAECES | 06/01/2016 | 1 | neg/SEQ | Suscept             |
| 57/19/16 | Enteritidis      | FAECES | 24/07/2016 | 1 | neg     | ND                  |
| 57/20/16 | Enteritidis      | FAECES | 24/07/2016 | 1 | neg     | ND                  |
| 55/39/16 | Enteritidis      | FAECES | 28/09/2016 | 1 | neg     | ND                  |
| 55/34/16 | Enteritidis      | FAECES | 03/10/2016 | 1 | neg     | Suscept             |
| 57/37/16 | 1,4,[5],12:i:-   | FAECES | 01/09/2016 | 1 | neg     | ASSuT               |
| 57/38/16 | 1,4,[5],12:i:-   | FAECES | 18/09/2016 | 1 | neg     | ACSSuTGTmpSxt       |
| 17/2/18  | Anatum           | URINE  | 14/06/2016 | 1 | neg     | T                   |
| 27/11/17 | Bovismorbificans | FAECES | 16/03/2016 | 1 | neg     | Suscept             |
| 56/1/18  | Brandenburg      | FAECES | 31/03/2016 | 1 | neg     | Suscept             |
| 54/1/18  | Brandenburg      | FAECES | 10/06/2016 | 1 | neg     | Suscept             |
| 39/8/16  | Brandenburg      | FAECES | 27/06/2016 | 1 | neg     | ND                  |
| 57/11/16 | Gallinarum       | FAECES | 07/07/2016 | 1 | neg     | Suscept             |
| 38/20/17 | Infantis         | FAECES | 23/01/2016 | 1 | neg     | ND                  |
| 38/9/17  | Derby            | FAECES | 05/12/2016 | 1 | neg     | ND                  |
| 38/4/17  | Saintpaul        | FAECES | 08/10/2016 | 1 | neg     | ND                  |
| 55/38/16 | Napoli           | FAECES | 15/09/2016 | 1 | neg     | ND                  |
| 38/6/17  | Virchow          | FAECES | 02/11/2016 | 1 | neg     | ND                  |
| 8/12/18  | Enteritidis      | FAECES | 13/06/2017 | 1 | neg     | Suscept             |
| 18/19/17 | 1,4,[5],12:i:-   | FAECES | 12/01/2017 | 1 | neg     | ND                  |
| 8/9/18   | 1,4,[5],12:i:-   | FAECES | 10/03/2017 | 1 | neg     | ASSuTAmc            |
| 8/11/18  | 1,4,[5],12:i:-   | FAECES | 05/05/2017 | 1 | neg     | ASSuTAmc            |
| 53/33/17 | 1,4,[5],12:i:-   | FAECES | 31/07/2017 | 1 | neg     | ASSuT               |
| 53/34/17 | 1,4,[5],12:i:-   | FAECES | 07/08/2017 | 1 | neg     | ASSuT               |
| 63/12/17 | 1,4,[5],12:i:-   | FAECES | 08/08/2017 | 1 | neg     | ASSuTTmpSxtKCtx     |
| 75/7/18  | 1,4,[5],12:i:-   | FAECES | 12/08/2017 | 1 | neg     | AC                  |
| 57/10/17 | 1,4,[5],12:i:-   | FAECES | 21/08/2017 | 1 | neg     | ACSSuTTmpSxt        |
| 60/3/17  | 1,4,[5],12:i:-   | FAECES | 04/09/2017 | 1 | neg     | ASSuT               |
| 60/10/17 | 1,4,[5],12:i:-   | FAECES | 06/09/2017 | 1 | neg     | ASuT                |
| 78/5/17  | 1,4,[5],12:i:-   | FAECES | 16/10/2017 | 1 | neg     | ASSuT               |
| 78/7/17  | 1,4,[5],12:i:-   | FAECES | 18/10/2017 | 1 | neg     | TmpSxt              |
| 8/17/18  | Typhimurium      | FAECES | 26/09/2017 | 1 | neg     | Suscept             |
| 8/21/18  | Typhimurium      | FAECES | 17/11/2017 | 1 | neg     | Suscept             |
| 54/8/18  | Brandenburg      | FAECES | 27/08/2017 | 1 | neg     | Suscept             |
| 83/49/17 | Brandenburg      | FAECES | 25/09/2017 | 1 | neg     | ND                  |
| 51/75/18 | Brandenburg      | FAECES | 28/10/2017 | 1 | neg     | ND                  |
| 84/20/17 | Brandenburg      | FAECES | 13/11/2017 | 1 | neg     | ND                  |
| 51/74/18 | Brandenburg      | FAECES | 22/11/2017 | 1 | neg     | Suscept             |
| 54/20/18 | Brandenburg      | FAECES | 15/12/2017 | 1 | neg     | Suscept             |
| 5/9/18   | Brandenburg      | FAECES | 16/12/2017 | 1 | neg     | Suscept             |
| 45/4/18  | 6,7:l,w:-        | FAECES | 31/12/2017 | 1 | neg     | Suscept             |
| 75/13/18 | Corvallis        | FAECES | 28/10/2017 | 1 | neg     | Su                  |
| 83/1/17  | Infantis         | FAECES | 09/01/2017 | 1 | neg     | ATSuNaPefSxtTmpKCtx |

|          |                |        |            |   |     |                      |
|----------|----------------|--------|------------|---|-----|----------------------|
| 83/15/17 | Infantis       | FAECES | 27/03/2017 | 1 | neg | Suscept              |
| 4/25/19  | Infantis       | FAECES | 05/04/2017 | 1 | neg | ND                   |
| 60/9/17  | Infantis       | FAECES | 30/08/2017 | 1 | neg | ND                   |
| 40/7/17  | Napoli         | URINE  | 22/05/2017 | 1 | neg | ND                   |
| 75/3/18  | Napoli         | BLOOD  | 10/07/2017 | 1 | neg | Suscept              |
| 66/5/17  | Napoli         | FAECES | 27/07/2017 | 1 | neg | ND                   |
| 53/42/17 | Napoli         | FAECES | 07/08/2017 | 1 | neg | ND                   |
| 53/43/17 | Napoli         | FAECES | 12/08/2017 | 1 | neg | ND                   |
| 75/9/18  | Napoli         | FAECES | 18/08/2017 | 1 | neg | Suscept              |
| 72/4/17  | Napoli         | FAECES | 28/09/2017 | 1 | neg | ND                   |
| 83/56/17 | Napoli         | FAECES | 12/10/2017 | 1 | neg | ND                   |
| 75/10/18 | Ndolo          | FAECES | 01/09/2017 | 1 | neg | Suscept              |
| 8/19/18  | Paratyphi b    | FAECES | 05/10/2017 | 1 | neg | Su                   |
| 45/16/18 | Enteritidis    | FAECES | 21/03/2018 | 1 | neg | Suscept              |
| 68/14/18 | Enteritidis    | FAECES | 03/04/2018 | 1 | neg | Suscept              |
| 91/5/18  | Enteritidis    | FAECES | 18/07/2018 | 1 | neg | Suscept              |
| 77/77/18 | Enteritidis    | FAECES | 28/08/2018 | 1 | neg | Suscept              |
| 77/21/18 | Enteritidis    | FAECES | 31/08/2018 | 1 | neg | Suscept              |
| 68/26/18 | 1,4,[5],12:i:- | FAECES | 05/07/2018 | 1 | neg | ASSuTAmc             |
| 77/45/18 | 1,4,[5],12:i:- | FAECES | 04/09/2018 | 1 | neg | ASSuTAmc             |
| 77/38/18 | 1,4,[5],12:i:- | FAECES | 10/09/2018 | 1 | neg | ASSuTAmc             |
| 91/23/18 | 1,4,[5],12:i:- | FAECES | 12/09/2018 | 1 | neg | ASSuT                |
| 77/61/18 | 1,4,[5],12:i:- | FAECES | 13/09/2018 | 1 | neg | ASSuT                |
| 3/9/19   | 1,4,[5],12:i:- | FAECES | 30/10/2018 | 1 | neg | ACSSuTTmpSxtKGNaPef  |
| 15/1/19  | 1,4,[5],12:i:- | FAECES | 06/11/2018 | 1 | neg | ASSuT                |
| 36/1/18  | 6,7:-:1,5      | FAECES | 22/03/2018 | 1 | neg | ND                   |
| 45/5/18  | 6,7:-:1,5      | BLOOD  | 31/03/2018 | 1 | neg | ACSTG                |
| 54/29/18 | Brandenburg    | FAECES | 25/01/2018 | 1 | neg | Suscept              |
| 51/76/18 | Brandenburg    | FAECES | 15/02/2018 | 1 | neg | Suscept              |
| 51/69/18 | Brandenburg    | FAECES | 20/02/2018 | 1 | neg | Suscept              |
| 51/67/18 | Brandenburg    | FAECES | 16/04/2018 | 1 | neg | Suscept              |
| 51/68/18 | Brandenburg    | FAECES | 19/05/2018 | 1 | neg | Suscept              |
| 51/71/18 | Brandenburg    | FAECES | 24/05/2018 | 1 | neg | Suscept              |
| 55/20/18 | Infantis       | FAECES | 23/01/2018 | 1 | neg | Suscept              |
| 45/19/18 | Infantis       | FAECES | 15/03/2018 | 1 | neg | ASSuTAmcSxtTmpKNaPef |
| 4/28/19  | Infantis       | FAECES | 31/05/2018 | 1 | neg | ASSuTTmpSxtKCtxNaPef |
| 73/2/18  | Napoli         | FAECES | 11/06/2018 | 1 | neg | Suscept              |
| 93/2/18  | Napoli         | FAECES | 24/08/2018 | 1 | neg | Suscept              |
| 18/3/19  | Napoli         | FAECES | 06/09/2018 | 1 | neg | Suscept              |
| 93/8/18  | Napoli         | FAECES | 20/09/2018 | 1 | neg | Suscept              |
| 4/29/19  | Rissen         | URINE  | 24/10/2018 | 1 | neg | ATAmcKCazCtxFox      |
| 13/24/19 | Typhi          | BLOOD  | 02/10/2018 | 1 | neg | ND                   |
| 55/19/16 | Typhimurium    | FAECES | 07/09/2016 | 1 | neg | ND                   |
| 57/43/16 | Typhimurium    | URINE  | 27/09/2016 | 1 | neg | ACSSuTAmcNaPef       |
| 68/30/18 | Typhimurium    | FAECES | 20/03/2018 | 1 | neg | ACSSuTAmc            |
| 68/23/18 | Typhimurium    | FAECES | 03/06/2018 | 1 | neg | AAmc                 |
| 3/1/19   | Typhimurium    | FAECES | 21/07/2018 | 1 | neg | ACSSuTPefCazCtx      |
| 45/2/18  | Umbilo         | FAECES | 04/05/2018 | 1 | neg | Suscept              |
| 58/37/18 | Veneziana      | FAECES | 02/07/2018 | 1 | neg | ND                   |

|          |                  |        |            |     |     |                     |
|----------|------------------|--------|------------|-----|-----|---------------------|
| 75/16/18 | Enteritidis      | FAECES | 08/01/2016 | 0.5 | neg | Suscept             |
| 57/2/16  | Enteritidis      | FAECES | 13/05/2016 | 0.5 | neg | Suscept             |
| 57/31/16 | Enteritidis      | FAECES | 09/07/2016 | 0.5 | neg | Suscept             |
| 57/24/16 | Enteritidis      | FAECES | 02/08/2016 | 0.5 | neg | Suscept             |
| 57/40/16 | Enteritidis      | FAECES | 14/09/2016 | 0.5 | neg | Suscept             |
| 55/35/16 | Enteritidis      | FAECES | 14/09/2016 | 0.5 | neg | ND                  |
| 55/41/16 | Enteritidis      | FAECES | 16/09/2016 | 0.5 | neg | ND                  |
| 55/13/16 | Enteritidis      | FAECES | 20/09/2016 | 0.5 | neg | ND                  |
| 57/42/16 | 1,4,[5],12:i:-   | FAECES | 19/09/2016 | 0.5 | neg | ASSuT               |
| 57/9/16  | Agama            | FAECES | 27/06/2016 | 0.5 | neg | ASSuAmc             |
| 27/26/16 | Bovismorbificans | FAECES | 11/04/2016 | 0.5 | neg | Su                  |
| 55/12/16 | Derby            | FAECES | 24/08/2016 | 0.5 | neg | SSu                 |
| 55/27/16 | Napoli           | FAECES | 04/08/2016 | 0.5 | neg | ND                  |
| 27/19/16 | Panama           | FAECES | 19/02/2016 | 0.5 | neg | SuT                 |
| 55/37/16 | Panama           | FAECES | 30/09/2016 | 0.5 | neg | ASuTAmcTmpSxt       |
| 27/8/16  | Paratyphi a      | BLOOD  | 04/03/2016 | 0.5 | neg | NaPef               |
| 27/4/16  | Rissen           | FAECES | 24/01/2016 | 0.5 | neg | ASuTAmcTmpSxt       |
| 77/82/18 | Schwarzengrund   | FAECES | 03/08/2016 | 0.5 | neg | ND                  |
| 55/18/16 | Typhimurium      | FAECES | 02/08/2016 | 0.5 | neg | ND                  |
| 55/32/16 | Typhimurium      | FAECES | 02/09/2016 | 0.5 | neg | ND                  |
| 55/11/16 | Typhimurium      | FAECES | 10/09/2016 | 0.5 | neg | ND                  |
| 5/7/17   | Enteritidis      | FAECES | 02/01/2017 | 0.5 | neg | ND                  |
| 8/13/18  | Enteritidis      | FAECES | 13/06/2017 | 0.5 | neg | Suscept             |
| 8/16/18  | 1,4,[5],12:i:-   | FAECES | 07/08/2017 | 0.5 | neg | ASSuTAmc            |
| 60/1/17  | 1,4,[5],12:i:-   | FAECES | 07/08/2017 | 0.5 | neg | ND                  |
| 61/8/17  | 1,4,[5],12:i:-   | FAECES | 12/09/2017 | 0.5 | neg | ASSu                |
| 78/4/17  | 1,4,[5],12:i:-   | FAECES | 15/10/2017 | 0.5 | neg | TmpSxt              |
| 75/12/18 | 1,4,[5],12:i:-   | FAECES | 18/10/2017 | 0.5 | neg | ASuT                |
| 78/11/17 | 1,4,[5],12:i:-   | FAECES | 23/10/2017 | 0.5 | neg | ND                  |
| 17/5/18  | 43:z4,z23:-      | FAECES | 15/10/2017 | 0.5 | neg | SSu                 |
| 51/72/18 | Brandenburg      | FAECES | 13/11/2017 | 0.5 | neg | Suscept             |
| 75/11/18 | Corvallis        | FAECES | 19/09/2017 | 0.5 | neg | Su                  |
| 75/15/18 | Livingstone      | FAECES | 21/12/2017 | 0.5 | neg | Suscept             |
| 75/6/18  | Napoli           | BLOOD  | 13/08/2017 | 0.5 | neg | Suscept             |
| 75/8/18  | Napoli           | FAECES | 14/08/2017 | 0.5 | neg | Suscept             |
| 2/1/18   | Napoli           | FAECES | 25/09/2017 | 0.5 | neg | Suscept             |
| 36/1/17  | Paratyphi a      | BLOOD  | 07/03/2017 | 0.5 | neg | SuNaPef             |
| 83/18/17 | Typhi            | BLOOD  | 14/04/2017 | 0.5 | neg | NaPef               |
| 83/58/17 | Typhi            | BLOOD  | 15/10/2017 | 0.5 | neg | ACSSuAmcTmpSxtNaPef |
| 8/14/18  | Worthington      | FAECES | 07/07/2017 | 0.5 | neg | Su                  |
| 13/10/19 | 1,4,[5],12:i:-   | FAECES | 04/01/2018 | 0.5 | neg | ASSuTSxtG           |
| 55/19/18 | 1,4,[5],12:i:-   | FAECES | 19/01/2018 | 0.5 | neg | ASSuTAmc            |
| 13/16/19 | 1,4,[5],12:i:-   | FAECES | 22/01/2018 | 0.5 | neg | ASSuTTmpSxtKNaPef   |
| 55/27/18 | 1,4,[5],12:i:-   | FAECES | 28/01/2018 | 0.5 | neg | ASSuTAmc            |
| 68/8/18  | 1,4,[5],12:i:-   | FAECES | 05/03/2018 | 0.5 | neg | ASSuT               |
| 68/31/18 | 1,4,[5],12:i:-   | FAECES | 09/04/2018 | 0.5 | neg | ASSuTAmc            |
| 75/21/18 | 1,4,[5],12:i:-   | FAECES | 28/05/2018 | 0.5 | neg | ASSuAmc             |
| 3/3/19   | 1,4,[5],12:i:-   | FAECES | 14/08/2018 | 0.5 | neg | ASSuTAmc            |
| 3/5/19   | 1,4,[5],12:i:-   | FAECES | 24/08/2018 | 0.5 | neg | ACSu                |

|          |                |        |            |      |     |                         |
|----------|----------------|--------|------------|------|-----|-------------------------|
| 77/62/18 | 1,4,[5],12:i:- | FAECES | 31/08/2018 | 0.5  | neg | ASSuT                   |
| 77/30/18 | 1,4,[5],12:i:- | FAECES | 07/09/2018 | 0.5  | neg | ASSuTAmc                |
| 3/8/19   | 1,4,[5],12:i:- | FAECES | 14/09/2018 | 0.5  | neg | ASSuT                   |
| 13/12/19 | 1,4,[5],12:i:- | FAECES | 20/09/2018 | 0.5  | neg | SuT                     |
| 79/15/18 | 1,4,[5],12:i:- | FAECES | 04/10/2018 | 0.5  | neg | ASSuT                   |
| 13/15/19 | 1,4,[5],12:i:- | FAECES | 18/10/2018 | 0.5  | neg | ASSuTTmpSxt             |
| 15/3/19  | 1,4,[5],12:i:- | FAECES | 15/11/2018 | 0.5  | neg | ASSuT                   |
| 15/13/19 | 1,4,[5],12:i:- | FAECES | 27/12/2018 | 0.5  | neg | ASSuT                   |
| 13/22/19 | 41:z:1,5       | FAECES | 31/08/2018 | 0.5  | neg | NaPef                   |
| 55/22/18 | Brandenburg    | FAECES | 22/01/2018 | 0.5  | neg | Suscept                 |
| 56/4/18  | Brandenburg    | FAECES | 27/06/2018 | 0.5  | neg | ND                      |
| 13/1/19  | Brandenburg    | FAECES | 11/08/2018 | 0.5  | neg | ND                      |
| 17/3/18  | Butantan       | FAECES | 30/01/2018 | 0.5  | neg | ASSuTAmc                |
| 13/7/19  | Choleraesuis   | BLOOD  | 06/10/2018 | 0.5  | neg | ND                      |
| 74/1/18  | Coeln          | FAECES | 02/08/2018 | 0.5  | neg | ND                      |
| 13/5/19  | Coeln          | FAECES | 05/11/2018 | 0.5  | neg | ND                      |
| 75/17/18 | Cullingworth   | FAECES | 30/03/2018 | 0.5  | neg | Su                      |
| 13/13/19 | Derby          | FAECES | 13/10/2018 | 0.5  | neg | ASSuTTmpSxtGNaPef       |
| 4/14/19  | Goldcoast      | FAECES | 02/08/2018 | 0.5  | neg | Suscept                 |
| 13/3/19  | Goldcoast      | FAECES | 16/11/2018 | 0.5  | neg | ND                      |
| 4/26/19  | Infantis       | FAECES | 15/03/2018 | 0.5  | neg | ASSuTTmpSxtKCazCtxNaPef |
| 93/1/18  | Napoli         | FAECES | 21/08/2018 | 0.5  | neg | Suscept                 |
| 93/5/18  | Napoli         | FAECES | 05/09/2018 | 0.5  | neg | Suscept                 |
| 47/1/18  | Pasing         | URINE  | 31/05/2018 | 0.5  | neg | ND                      |
| 75/18/18 | Rissen         | URINE  | 05/04/2018 | 0.5  | neg | Suscept                 |
| 13/18/19 | Rissen         | FAECES | 22/10/2018 | 0.5  | neg | ND                      |
| 15/14/19 | Rissen         | FAECES | 23/12/2018 | 0.5  | neg | Su                      |
| 45/6/18  | S.spp          | URINE  | 30/03/2018 | 0.5  | neg | SuT                     |
| 36/2/18  | Tambacounda    | URINE  | 21/03/2018 | 0.5  | neg | ND                      |
| 13/25/19 | Typhi          | BLOOD  | 13/06/2018 | 0.5  | neg | ND                      |
| 45/27/18 | Typhimurium    | FAECES | 03/01/2018 | 0.5  | neg | SSuT                    |
| 55/24/18 | Typhimurium    | FAECES | 12/01/2018 | 0.5  | neg | ND                      |
| 52/9/18  | Typhimurium    | FAECES | 08/06/2018 | 0.5  | neg | ASSuTAmcTmpSxtCazCtx    |
| 68/27/18 | Typhimurium    | FAECES | 17/07/2018 | 0.5  | neg | ASSuAmc                 |
| 3/7/19   | Typhimurium    | FAECES | 13/09/2018 | 0.5  | neg | ND                      |
| 13/20/19 | Typhimurium    | FAECES | 08/11/2018 | 0.5  | neg | ACSSuTAmcNaPef          |
| 45/25/18 | Veneziana      | FAECES | 17/04/2018 | 0.5  | neg | ND                      |
| 75/19/18 | Zanzibar       | FAECES | 17/04/2018 | 0.5  | neg | ASSuAmcK                |
| 27/17/16 | Enteritidis    | FAECES | 06/04/2016 | 0.25 | neg | ND                      |
| 57/3/16  | Enteritidis    | FAECES | 13/05/2016 | 0.25 | neg | Suscept                 |
| 57/4/16  | Enteritidis    | FAECES | 17/06/2016 | 0.25 | neg | Suscept                 |
| 57/7/16  | Enteritidis    | FAECES | 19/06/2016 | 0.25 | neg | Suscept                 |
| 57/18/16 | Enteritidis    | FAECES | 24/07/2016 | 0.25 | neg | Suscept                 |
| 57/15/16 | Enteritidis    | FAECES | 24/07/2016 | 0.25 | neg | ND                      |
| 57/16/16 | Enteritidis    | FAECES | 24/07/2016 | 0.25 | neg | ND                      |
| 57/17/16 | Enteritidis    | FAECES | 24/07/2016 | 0.25 | neg | ND                      |
| 57/25/16 | Enteritidis    | FAECES | 08/08/2016 | 0.25 | neg | Suscept                 |
| 57/26/16 | Enteritidis    | FAECES | 11/08/2016 | 0.25 | neg | Suscept                 |
| 55/7/16  | Enteritidis    | FAECES | 22/08/2016 | 0.25 | neg | ND                      |

|          |                  |        |            |      |     |                        |
|----------|------------------|--------|------------|------|-----|------------------------|
| 55/30/16 | Enteritidis      | FAECES | 16/09/2016 | 0.25 | neg | ND                     |
| 55/42/16 | Enteritidis      | FAECES | 24/09/2016 | 0.25 | neg | ND                     |
| 27/23/16 | Bovismorbificans | FAECES | 23/03/2016 | 0.25 | neg | Su                     |
| 55/3/16  | Coeln            | FAECES | 05/08/2016 | 0.25 | neg | ND                     |
| 57/8/16  | Javiana          | FAECES | 28/06/2016 | 0.25 | neg | Suscept                |
| 52/1/16  | Napoli           | FAECES | 28/06/2016 | 0.25 | neg | Suscept                |
| 55/25/16 | Napoli           | FAECES | 20/08/2016 | 0.25 | neg | ND                     |
| 55/1/16  | Newport          | FAECES | 15/07/2016 | 0.25 | neg | ND                     |
| 55/24/16 | Paratyphi b      | FAECES | 07/09/2016 | 0.25 | neg | Suscept                |
| 55/4/16  | Rissen           | FAECES | 08/08/2016 | 0.25 | neg | ND                     |
| 55/21/16 | Typhimurium      | FAECES | 02/08/2016 | 0.25 | neg | ND                     |
| 8/20/18  | 43:z4,z23:-      | FAECES | 30/10/2017 | 0.25 | neg | SSu                    |
| 75/1/18  | Napoli           | FAECES | 20/06/2017 | 0.25 | neg | Suscept                |
| 75/4/18  | Napoli           | FAECES | 19/07/2017 | 0.25 | neg | Suscept                |
| 75/5/18  | Napoli           | FAECES | 08/08/2017 | 0.25 | neg | Suscept                |
| 38/22/17 | Typhi            | FAECES | 14/04/2017 | 0.25 | neg | ND                     |
| 75/2/18  | Typhi            | URINE  | 21/06/2017 | 0.25 | neg | SNaPef                 |
| 91/16/18 | Enteritidis      | BLOOD  | 24/08/2018 | 0.25 | neg | Su                     |
| 13/19/19 | 1,4,[5],12:i:-   | FAECES | 29/01/2018 | 0.25 | neg | ASSuTTmpSxtNaPef       |
| 79/1/18  | 1,4,[5],12:i:-   | FAECES | 13/09/2018 | 0.25 | neg | ASSuTNaPef             |
| 18/2/19  | 1,4,[5],12:i:-   | FAECES | 12/11/2018 | 0.25 | neg | ASSuT                  |
| 15/4/19  | 1,4,[5],12:i:-   | FAECES | 18/11/2018 | 0.25 | neg | ASSuT                  |
| 4/12/19  | Goldcoast        | FAECES | 11/07/2018 | 0.25 | neg | NaPef                  |
| 4/27/19  | Infantis         | FAECES | 17/03/2018 | 0.25 | neg | ASSuTTmpSxtCazCtxNaPef |
| 4/30/19  | Infantis         | FAECES | 31/12/2018 | 0.25 | neg | ASSuTTmpSxtCazCtxNaPef |
| 4/31/19  | Rissen           | FAECES | 23/11/2018 | 0.25 | neg | ACSSuTTmpSxtKGNAPef    |

UNK: unknown information; ND: not determined; neg: negative PCR for *mcr-1* to *mcr-10* genes; 1,4,[5],12:i:- : *S. Typhimurium* monophasic variant; \*: strain out of the surveillance period 2016-2018; suscept: Susceptible to all the other antimicrobials tested; Na: nalidixic acid; Pef: pefloxacin; A: ampicillin; Ctx: cefotaxime; Caz: ceftazidime, Amc: amoxicillin/clavulanic acid 2:1; Fox: cefoxitin, C: chloramphenicol; G: gentamicin; K: kanamycin; S: streptomycin; Su: sulfonamides; T: tetracycline; Tmp: trimethoprim; Sxt: trimethoprim–sulfamethoxazole.
